# Supplementary material for: Study on the mechanism of morphology regulation of Pb-based MOFs and catalytic thermal decomposition mechanism of energetic materials
Source: Royal Society of Chemistry journal article supplement (doi:10.1039/d5ce00889a), 2025-12-08
Supplement: d5ce00889a1.pdf [file d5ce00889a1.pdf]

*Supplementary Material*

**Study on the mechanism of morphology regulation of Pb-based  
MOFs and catalytic thermal decomposition mechanism of  
energy-containing materials**

Shilin Cao<sup>1</sup>, Yubin Zhao<sup>1</sup>, Gengyang Yao<sup>1</sup>, Peiwei Gao<sup>1</sup>, Xiaofeng Shi<sup>1\*</sup>

<sup>1</sup>School of Environment and Safety Engineering, North University of China, Taiyuan, 030051  
China

## Sample characterization

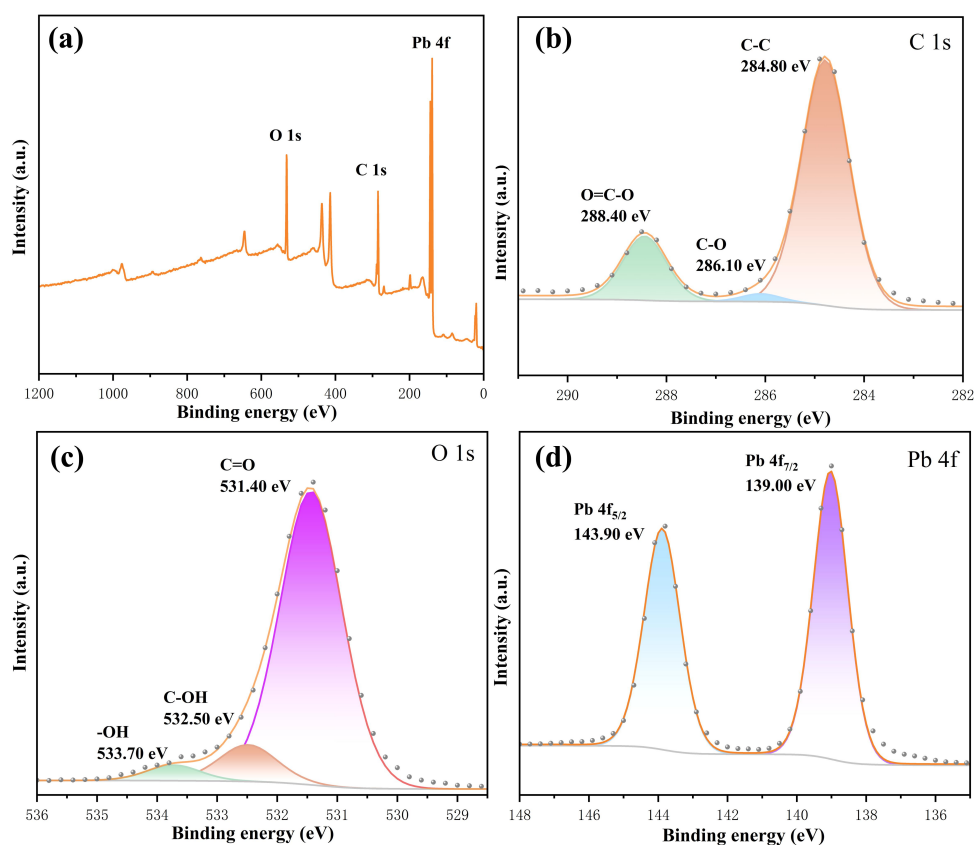

Fig. S1 XPS map of Pb-MOF-1, (a) full spectrum; (b) C 1s; (c) O 1s; (d) Pb 4f

As shown in Figure S1, the C 1s spectrum shows a structure similar to that of Pb-MOF, containing C-C (284.8 eV), C-O (286.1 eV), and O-C=O (288.4 eV) species. The O 1s spectrum contains C=O (531.4 eV) and C-OH (532.5 eV) peaks. An additional peak was observed at 533.7 eV, which can be attributed to adsorbed water molecules or free hydroxyl groups (-OH). The binding energies of Pb 4f Pb 4f<sub>7/2</sub> and Pb 4f<sub>5/2</sub> are located at 139.0 eV and 143.9 eV, respectively, which are in agreement with the values of Pb-MOF, suggesting a similar valence and chemical environment for Pb.

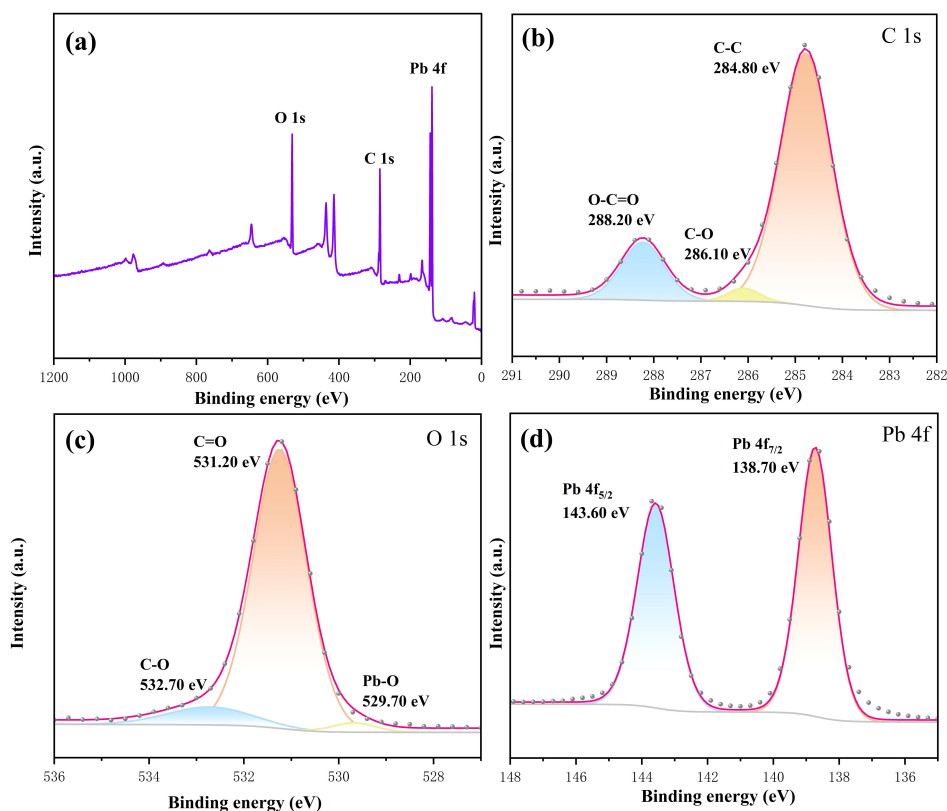

Fig. S2 XPS map of Pb-MOF-2, (a) full spectrum; (b) C 1s; (c) O 1s; (d) Pb 4f

As shown in Fig. S2, the C 1s spectrum shows the standard carbon species peaks; C-C (284.8 eV), C-O (286.1 eV) and O-C=O (288.2 eV). C=O (531.2 eV), C-O (532.7 eV) and Pb-O (529.7 eV) species are present in the O 1s spectrum. The binding energies of Pb 4f<sub>7/2</sub> and Pb 4f<sub>5/2</sub> in Pb 4f are located at 138.7 eV and 143.6 eV, respectively. The binding energies are negatively shifted by about 0.3 eV compared to Pb-MOF.

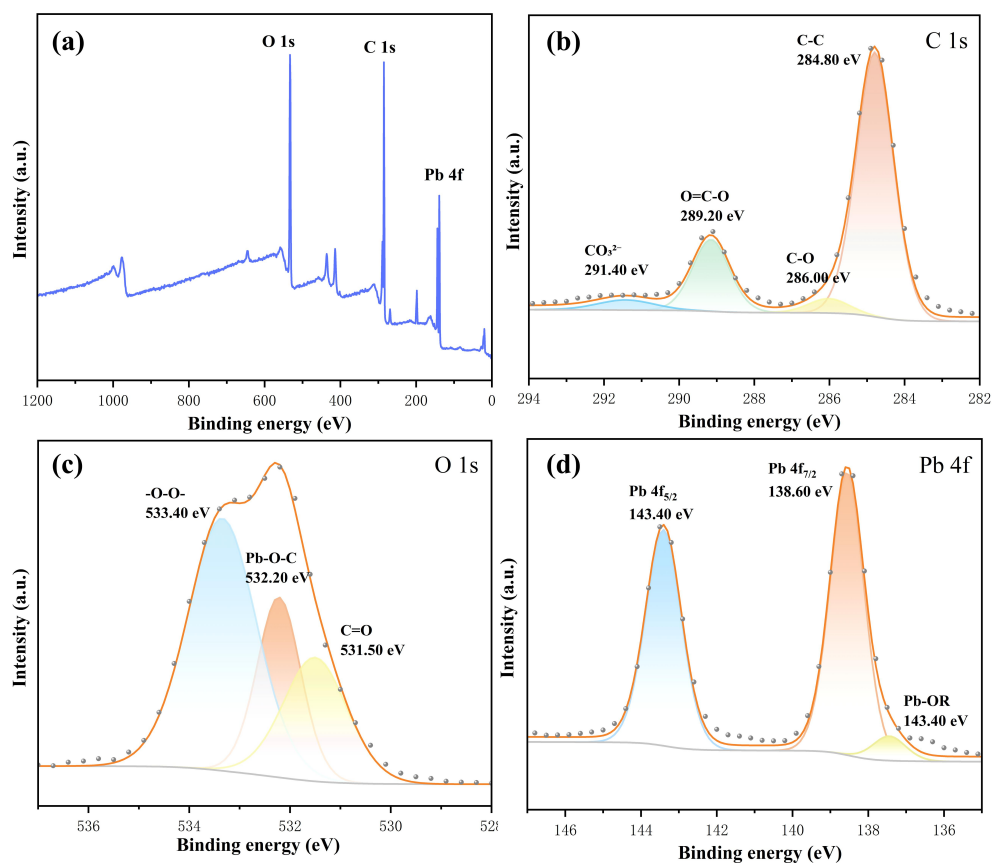

Fig. S3 XPS map of Pb-MOF-3, (a) full spectrum; (b) C 1s; (c) O 1s; (d) Pb 4f

As shown in Figure S3, in addition to the C-C (284.8 eV), C-O (286.0 eV), and O-C=O (289.2 eV) peaks in the C 1s, there is a strongly characterised peak at 291.4 eV, which is usually attributed to the carbonate  $\text{CO}_3^{2-}$  species. The O 1s spectrum is more complex and three peaks are proposed to be synthesised: C=O (531.5 eV), Pb-O-C (532.2 eV) and a peak at 533.4 eV, which may be related to peroxy groups (-O-O-) or strongly adsorbed water. The main double peaks of Pb 4f are located at 138.6 eV (Pb 4f<sub>7/2</sub>) and 143.4 eV (Pb 4f<sub>5/2</sub>), which are shifted negatively by about 0.4 eV compared to the Pb-MOF binding energy. the shape of the spectrum suggests that another Pb species (e.g., Pb-OR) may be present.

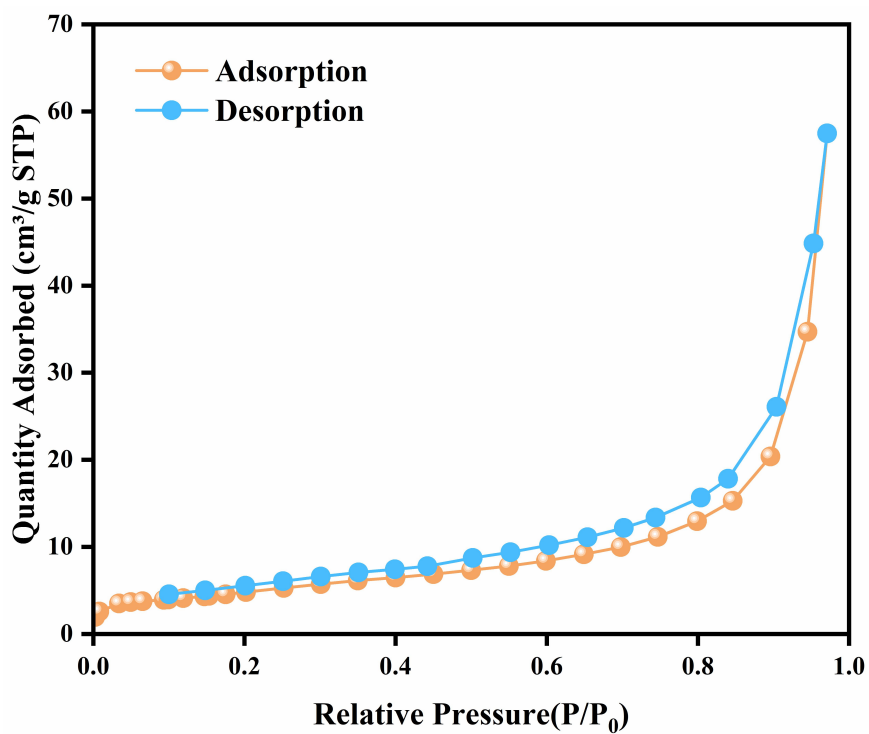

Fig. S4 N<sub>2</sub> adsorption-desorption isotherm of Pb-MOF measured at 77 K.

The measurement was performed at 77 K. The sample was degassed under vacuum at 120 °C for 6 h prior to the measurement. The BET surface area, calculated from the adsorption branch data, is 15.2 m<sup>2</sup>/g. This relatively low value indicates a low-porosity material, which is consistent with the dense structure observed in the single-crystal X-ray diffraction analysis.

**Table S1. Crystallographic parameters of compound Pb-MOF**

| Compound                                                | $\{[\text{Cu}^{\text{II}}\text{Fe}^{\text{III}}_3\text{O}(\text{tza})_6(\text{H}_2\text{O})_3] \cdot (\text{NO}_3)_2 \cdot \text{OH}\}_n\}$ |
|---------------------------------------------------------|---------------------------------------------------------------------------------------------------------------------------------------------|
| Empirical formula                                       | $\text{C}_{11}\text{H}_{11.57}\text{O}_{5.28}\text{PbN}$                                                                                    |
| Formula weight                                          | 449.49                                                                                                                                      |
| Temperature(K)                                          | 153.15                                                                                                                                      |
| Crystal system                                          | monoclinic                                                                                                                                  |
| Space group                                             | $P2_1/n$                                                                                                                                    |
| $a(\text{\AA})$                                         | 11.635(2)                                                                                                                                   |
| $b(\text{\AA})$                                         | 6.5838(13)                                                                                                                                  |
| $c(\text{\AA})$                                         | 17.079(3)                                                                                                                                   |
| $\alpha(^{\circ})$                                      | 90                                                                                                                                          |
| $\beta(^{\circ})$                                       | 91.82(3)                                                                                                                                    |
| $\gamma(^{\circ})$                                      | 90                                                                                                                                          |
| $Z$                                                     | 4                                                                                                                                           |
| $\rho_{\text{calc}} \text{ (g/cm}^3\text{)}$            | 2.283                                                                                                                                       |
| $\mu \text{ (mm}^{-1}\text{)}$                          | 12.916                                                                                                                                      |
| $F(000)$                                                | 835.0                                                                                                                                       |
| 2 $\theta$ range for data collection/ $^{\circ}$        | 6.632 to 54.974                                                                                                                             |
| $h/k/l(\text{max})$                                     | 15, 8, 22                                                                                                                                   |
| $h/k/l$                                                 | $-11 \leq h \leq 16, -8 \leq k \leq 8, -21 \leq l \leq 22$                                                                                  |
| Reflections collected                                   | 10103                                                                                                                                       |
| Independent reflections                                 | 2971 [ $R_{\text{int}} = 0.0507$ , $R_{\text{sigma}} = 0.0425$ ]                                                                            |
| Data/restraints/parameters                              | 2971/198/173                                                                                                                                |
| Goodness-of-fit on $F^2$                                | 1.122                                                                                                                                       |
| Final R indices [ $I > 2\sigma(I)$ ]                    | $R_1 = 0.0357$ , $wR_2 = 0.0723$                                                                                                            |
| R indices (all data)                                    | $R_1 = 0.0386$ , $wR_2 = 0.0738$                                                                                                            |
| Largest difference peak and hole(e. $\text{\AA}^{-3}$ ) | 1.33/-1.62                                                                                                                                  |
| $\text{volume}(\text{\AA}^3)$                           | 1307.6(4)                                                                                                                                   |

**Table S2. Geometric parameters of compound Pb-MOF bond length (Å)**

| bond length (Å)     |           |                    |           |
|---------------------|-----------|--------------------|-----------|
| Pb1-O1              | 2.494(4)  | N1-C10             | 1.464(12) |
| Pb1-O2 <sup>1</sup> | 2.545(4)  | N1-C11             | 1.444(12) |
| Pb1-O3              | 2.479(4)  | C1-C2              | 1.366(8)  |
| Pb1-O4              | 2.520(4)  | C1-C3 <sup>3</sup> | 1.398(8)  |
| Pb1-O6              | 2.619(5)  | C2-C3              | 1.384(8)  |
| Pb1-C8              | 2.861(6)  | C2-C4              | 1.515(8)  |
| O1-C4               | 1.270(7)  | C3-C1 <sup>3</sup> | 1.398(8)  |
| O2-Pb1 <sup>2</sup> | 2.545(4)  | C5-C6              | 1.376(9)  |
| O2-C4               | 1.266(7)  | C5-C7 <sup>4</sup> | 1.408(8)  |
| O3-C8               | 1.270(8)  | C6-C7              | 1.396(9)  |
| O4-C8               | 1.263(7)  | C7-C5 <sup>4</sup> | 1.408(8)  |
| O6-C9               | 1.246(10) | C7-C8              | 1.485(8)  |
| N1-C9               | 1.331(10) |                    |           |

13/2-X,1/2+Y,3/2-Z; 23/2-X,-1/2+Y,3/2-Z; 32-X,1-Y,2-Z; 41-X,2-Y,2-Z

**Table S3. Compound Pb-MOF geometric parameters Bond angle (°)**

| Bond angle (°) |            |                        |          |
|----------------|------------|------------------------|----------|
| O1-Pb1-O21     | 87.44(14)  | C11-N1-C10             | 118.7(8) |
| O1-Pb1-O4      | 69.61(14)  | C2-C1-C3 <sup>3</sup>  | 120.3(6) |
| O1-Pb1-O6      | 148.15(17) | C1-C2-C3               | 119.9(5) |
| O1-Pb1-C8      | 70.95(16)  | C1-C2-C4               | 120.2(5) |
| O21-Pb1-O6     | 83.19(16)  | C3-C2-C4               | 120.0(5) |
| O21-Pb1-C8     | 100.23(16) | C2-C3-C1 <sup>3</sup>  | 119.8(6) |
| O3-Pb1-O1      | 78.66(16)  | O1-C4-C2               | 117.7(5) |
| O3-Pb1-O21     | 126.30(14) | O2-C4-O1               | 122.7(5) |
| O3-Pb1-O4      | 52.41(14)  | O2-C4-C2               | 119.5(5) |
| O3-Pb1-O6      | 82.59(17)  | C6-C5-C7 <sup>4</sup>  | 120.8(6) |
| O3-Pb1-C8      | 26.29(16)  | C5-C6-C7               | 119.9(6) |
| O4-Pb1-O21     | 74.05(13)  | C5 <sup>4</sup> -C7-C8 | 120.4(5) |
| O4-Pb1-O6      | 78.54(17)  | C6-C7-C5 <sup>4</sup>  | 119.3(5) |
| O4-Pb1-C8      | 26.19(15)  | C6-C7-C8               | 120.3(5) |
| O6-Pb1-C8      | 80.85(18)  | O3-C8-Pb1              | 59.9(3)  |
| C4-O1-Pb1      | 101.7(4)   | O3-C8-C7               | 119.2(5) |
| C4-O2-Pb12     | 128.3(4)   | O4-C8-Pb1              | 61.7(3)  |
| C8-O3-Pb1      | 93.9(4)    | O4-C8-O3               | 121.3(5) |
| C8-O4-Pb1      | 92.1(3)    | O4-C8-C7               | 119.5(5) |
| C9-O6-Pb1      | 123.7(5)   | C7-C8-Pb <sup>1</sup>  | 175.2(4) |
| C9-N1-C10      | 120.4(8)   | O6-C9-N1               | 123.8(8) |
| C9-N1-C11      | 120.7(8)   |                        |          |

13/2-X,1/2+Y,3/2-Z; 23/2-X,-1/2+Y,3/2-Z; 32-X,1-Y,2-Z; 41-X,2-Y,2-Z



**Table S4. The average crystallite sizes of the four samples estimated from the Scherrer equation**

| Sample   | crystallite size(nm) |
|----------|----------------------|
| Pb-MOF   | 68.20                |
| Pb-MOF-1 | 24.41                |
| Pb-MOF-2 | 7.49                 |
| Pb-MOF-3 | 48.70                |
